# Supplementary material for: Prognostic Value of Exercise Capacity in Kidney Transplant Candidates
Source: PubMed Central journal article supplement — J Am Heart Assoc. 2022 Jun 14;11(12):e025862. doi: 10.1161/JAHA.121.025862 (PMC9238638; doi:10.1161/jaha.121.025862), 2022-06-14
Supplement: JAH3-11-e025862-s001.pdf [file JAH3-11-e025862-s001.pdf]

## **SUPPLEMENTAL MATERIAL**

**Table S1. Baseline characteristics stratified by transplantation status**

| <b>Demographics</b>                             | <b>Not Transplanted<br/>(n=373)</b> | <b>Transplanted<br/>(n=525)</b> | <b>p-<br/>value</b> |
|-------------------------------------------------|-------------------------------------|---------------------------------|---------------------|
| <b>Age (years)</b>                              | 51.7±11.9                           | 52.1±10.9                       | 0.607               |
| <b>Male sex</b>                                 | 234 (63%)                           | 352 (67%)                       | 0.181               |
| <b>BMI (kg/m<sup>2</sup>)</b>                   | 27.3±5.7                            | 27.0±5.0                        | 0.412               |
| <b>Cardiovascular risk factors</b>              |                                     |                                 |                     |
| <b>Diabetes</b>                                 | 141 (38%)                           | 210 (40%)                       | 0.506               |
| <b>Hypertension</b>                             | 319 (86%)                           | 472 (90%)                       | 0.046               |
| <b>Hyperlipidaemia</b>                          | 183 (49%)                           | 238 (45%)                       | 0.270               |
| <b>History of smoking</b>                       | 148 (40%)                           | 155 (30%)                       | 0.002               |
| <b>History of IHD</b>                           | 85 (23%)                            | 113 (22%)                       | 0.652               |
| <b>Previous transplantation</b>                 | 53 (14%)                            | 57 (11%)                        | 0.131               |
| <b>On renal replacement therapy</b>             |                                     |                                 |                     |
| <b>Peritoneal Dialysis</b>                      | 65 (17%)                            | 134 (26%)                       | 0.004               |
| <b>Haemodialysis</b>                            | 148 (40%)                           | 275 (52%)                       | <0.001              |
| <b>Cause of kidney disease</b>                  |                                     |                                 |                     |
| <b>Diabetes</b>                                 | 125 (34%)                           | 130 (25%)                       | 0.004               |
| <b>IgA nephropathy</b>                          | 59 (16%)                            | 91 (17%)                        | 0.548               |
| <b>Reflux nephropathy</b>                       | 25 (7%)                             | 46 (9%)                         | 0.260               |
| <b>Polycystic kidney disease</b>                | 33 (9%)                             | 70 (13%)                        | 0.038               |
| <b>Glomerulonephritis</b>                       | 73 (20%)                            | 112 (21%)                       | 0.520               |
| <b>Renovascular</b>                             | 26 (7%)                             | 23 (4%)                         | 0.092               |
| <b>Miscellaneous</b>                            | 32 (9%)                             | 53 (10%)                        | 0.444               |
| <b>Exercise stress echocardiography results</b> |                                     |                                 |                     |

|                                                     |           |           |        |
|-----------------------------------------------------|-----------|-----------|--------|
| <b>Test during long interdialytic interval</b>      | 61 (46%)  | 78 (33%)  | 0.011  |
| <b>Test performed on beta blockers</b>              | 170 (46%) | 209 (40%) | 0.085  |
| <b>Exercise duration (min)</b>                      | 7.1±2.9   | 7.9±2.5   | <0.001 |
| <b>Reached ≥85% MPHR</b>                            | 209 (56%) | 326 (62%) | 0.068  |
| <b>METs</b>                                         | 8.8±2.9   | 9.5±2.7   | <0.001 |
| <b>Achieved 4 METs</b>                              | 364 (98%) | 520 (99%) | 0.082  |
| <b>Achieved 7 METs</b>                              | 280 (75%) | 454 (86%) | <0.001 |
| <b>Achieved predicted METs</b>                      | 150 (40%) | 279 (53%) | <0.001 |
| <b>Baseline LVEF &lt;50%</b>                        | 70 (19%)  | 71 (14%)  | 0.033  |
| <b>Abnormal Stress Echocardiogram</b>               | 68 (18%)  | 75 (14%)  | 0.111  |
| <b>Non-diagnostic</b>                               | 19 (5%)   | 15 (3%)   | 0.265  |
| <b>Global failure in LV contractile reserve</b>     | 28 (8%)   | 23 (4%)   | 0.190  |
| <b>Inducible regional wall motion abnormalities</b> | 21 (6%)   | 37 (7%)   | 0.025  |
| <b>Underwent coronary angiography</b>               | 27 (40%)  | 29 (39%)  | 0.899  |
| <b>Non-MI revascularization</b>                     | 11 (3%)   | 17 (3%)   | 0.806  |
| <b>Outcomes</b>                                     |           |           |        |
| <b>MACE</b>                                         | 43 (12%)  | 50 (10%)  | 0.331  |
| <b>Cardiac Death</b>                                | 14 (4%)   | 7 (1%)    | 0.018  |
| <b>Non-fatal MI</b>                                 | 23 (6%)   | 30 (6%)   | 0.777  |
| <b>Stroke</b>                                       | 16 (4%)   | 16 (3%)   | 0.323  |

Values are mean ± standard deviation, median (Q1-Q3) or n (%).

*BMI – body mass index, IHD – ischaemic heart disease, LV – left ventricular, LVEF – left ventricular ejection fraction. MACE – major adverse cardiovascular outcomes, METs – metabolic equivalents, MI – myocardial infarction, MPHR – maximum predicted heart rate.*

**Table S2. Population characteristics stratified by 7 metabolic equivalents**

| <b>Demographics</b>                 | <b>&lt;7 METs<br/>(n=164)</b> | <b>≥7 METs<br/>(n=734)</b> | <b>p-value</b> |
|-------------------------------------|-------------------------------|----------------------------|----------------|
| <b>Age (years)</b>                  | 56.4±9.8                      | 50.9±11.4                  | <0.001*        |
| <b>Male sex</b>                     | 91 (55%)                      | 495 (68%)                  | 0.004          |
| <b>BMI (kg/m<sup>2</sup>)</b>       | 28.9±5.7                      | 26.7±5.1                   | <0.001         |
| <b>Cardiovascular risk factors</b>  |                               |                            |                |
| <b>Diabetes</b>                     | 96 (59%)                      | 255 (35%)                  | <0.001         |
| <b>Hypertension</b>                 | 148 (90%)                     | 643 (88%)                  | 0.345          |
| <b>Hyperlipidaemia</b>              | 77 (47%)                      | 344 (47%)                  | 0.984          |
| <b>History of smoking</b>           | 66 (40%)                      | 237 (32%)                  | 0.051          |
| <b>History of IHD</b>               | 54 (33%)                      | 144 (20%)                  | <0.001         |
| <b>Previous transplantation</b>     | 18 (11%)                      | 92 (13%)                   | 0.582          |
| <b>On renal replacement therapy</b> |                               |                            |                |
| <b>Peritoneal Dialysis</b>          | 45 (27%)                      | 154 (21%)                  | 0.072          |
| <b>Haemodialysis</b>                | 73 (45%)                      | 350 (48%)                  | 0.462          |
| <b>Cause of kidney disease</b>      |                               |                            |                |
| <b>Diabetes</b>                     | 82 (50%)                      | 173 (24%)                  | <0.001         |
| <b>IgA nephropathy</b>              | 18 (11%)                      | 132 (18%)                  | 0.030          |
| <b>Reflux nephropathy</b>           | 9 (5%)                        | 62 (8%)                    | 0.204          |
| <b>Polycystic kidney disease</b>    | 8 (5%)                        | 95 (13%)                   | 0.003          |
| <b>Glomerulonephritis</b>           | 22 (13%)                      | 163 (22%)                  | 0.012          |
| <b>Renovascular</b>                 | 11 (7%)                       | 38 (5%)                    | 0.435          |
| <b>Miscellaneous</b>                | 14 (9%)                       | 71 (10%)                   | 0.691          |

| <b>Exercise stress echocardiography results</b>     |               |               |        |
|-----------------------------------------------------|---------------|---------------|--------|
| <b>Test during long interdialytic interval</b>      | 24 (37%)      | 115 (38%)     | 0.891  |
| <b>Exercise duration (min)</b>                      | 3.7±1.4       | 8.5±2.1       | <0.001 |
| <b>Reached ≥85% MPHR</b>                            | 44 (27%)      | 491 (67%)     | <0.001 |
| <b>METs</b>                                         | 5.2±1.0       | 10.1±2.3      | <0.001 |
| <b>Baseline LVEF &lt;50%</b>                        | 44 (27%)      | 97 (13%)      | <0.001 |
| <b>Abnormal Stress Echocardiogram</b>               | 54 (33%)      | 89 (12%)      | <0.001 |
| <b>Non-diagnostic</b>                               | 24 (15%)      | 4 (1%)        | <0.001 |
| <b>Global failure in LV contractile reserve</b>     | 11 (7%)       | 40 (5%)       | 0.003  |
| <b>Inducible regional wall motion abnormalities</b> | 18 (11%)      | 40 (5%)       | 0.170  |
| <b>Non-MI revascularization</b>                     | 10 (6%)       | 18 (2%)       | 0.015* |
| <b>Transplanted</b>                                 | 71 (43%)      | 454 (62%)     | <0.001 |
| <b>Median time to transplantation</b>               | 1.5 [0.9-2.3] | 1.5 [0.7-2.9] | 0.964  |

Values are mean ± standard deviation, median (Q1-Q3) or n (%).

*BMI – body mass index, IHD – ischaemic heart disease, LV – left ventricular, LVEF – left ventricular ejection fraction. METs – metabolic equivalents, MI – myocardial infarction, MPHR – maximum predicted heart rate.*

**Table S3. Univariate associations of clinical factors, echocardiographic parameters, ability to achieve predicted metabolic equivalents and major adverse cardiovascular events**

| <b>Variable</b>                           | <b>Hazard ratio</b> | <b>95% CI</b> | <b>p-value</b> |
|-------------------------------------------|---------------------|---------------|----------------|
| <b>Age</b>                                | 1.01                | 0.99-1.03     | 0.327          |
| <b>Sex (female referent)</b>              | 0.58                | 0.34-0.96     | 0.035          |
| <b>Diabetes</b>                           | 2.40                | 1.54-3.74     | <0.001         |
| <b>Hypertension</b>                       | 2.43                | 0.89-6.63     | 0.084          |
| <b>Hyperlipidemia</b>                     | 2.25                | 1.42-3.57     | 0.001          |
| <b>History of smoking</b>                 | 1.97                | 1.27-3.05     | 0.003          |
| <b>History of ischaemic heart disease</b> | 1.92                | 1.23-3.01     | 0.004          |
| <b>Previous kidney transplantation</b>    | 0.49                | 0.20-1.21     | 0.123          |
| <b>Body mass index</b>                    | 1.03                | 0.99-1.07     | 0.200          |
| <b>Current renal replacement therapy</b>  | 1.22                | 0.72-2.07     | 0.451          |
| <b>LV hypertrophy</b>                     | 1.25                | 0.80-1.95     | 0.330          |
| <b>LV ejection fraction&lt;50%</b>        | 2.04                | 1.25-3.33     | 0.004          |
| <b>Abnormal stress echocardiogram</b>     | 1.52                | 0.92-2.52     | 0.105          |
| <b>Non-MI revascularization</b>           | 3.08                | 1.48-6.40     | 0.003          |
| <b>Achieved Predicted METs</b>            | 0.41                | 0.25-0.66     | <0.001         |
| <b>Kidney Transplant*</b>                 | 0.48                | 0.28-0.81     | 0.006          |

Hazard ratio for age was calculated per one year. Hazard ratio for body mass index was calculated per 1kg/m<sup>2</sup> increase.

\* Transplantation was treated as a time-dependent covariate

*CI – confidence interval, LV – left ventricle, METs – metabolic equivalents, MI – myocardial infarction*



**Table S4. Multivariable associations of clinical factors, echocardiographic parameters, metabolic equivalents as a continuous variable and major adverse cardiovascular events**

| <b>Variable</b>                           | <b>Hazard ratio</b> | <b>95% CI</b> | <b>p-value</b> |
|-------------------------------------------|---------------------|---------------|----------------|
| <b>Age</b>                                | 0.99                | 0.97-1.01     | 0.336          |
| <b>Sex (female referent)</b>              | 0.62                | 0.35-1.09     | 0.093          |
| <b>Diabetes</b>                           | 1.72                | 1.06-2.78     | 0.027          |
| <b>Hypertension</b>                       | 1.55                | 0.55-4.36     | 0.406          |
| <b>Hyperlipidaemia</b>                    | 1.73                | 1.05-2.86     | 0.031          |
| <b>History of smoking</b>                 | 1.41                | 0.89-2.23     | 0.144          |
| <b>History of ischaemic heart disease</b> | 1.11                | 0.67-1.82     | 0.689          |
| <b>Previous kidney transplantation</b>    | 0.53                | 0.21-1.34     | 0.179          |
| <b>Body mass index</b>                    | 1.00                | 0.95-1.04     | 0.846          |
| <b>LV ejection fraction&lt;50%</b>        | 1.41                | 0.81-2.44     | 0.220          |
| <b>Abnormal stress echocardiogram</b>     | 0.94                | 0.53-1.63     | 0.815          |
| <b>Non-MI revascularization</b>           | 1.92                | 0.89-4.11     | 0.095          |
| <b>METs</b>                               | 0.88                | 0.80-0.96     | 0.007          |
| <b>Kidney transplant*</b>                 | 0.53                | 0.30-0.92     | 0.024          |

Hazard ratio for age was calculated per one year. Hazard ratio for body mass index was calculated per 1kg/m<sup>2</sup> increase.

\* Transplantation was treated as a time-dependent covariate

*CI – confidence interval, LV – left ventricle, METs – metabolic equivalents, MI – myocardial infarction*

**Table S5. Multivariable associations of clinical factors, echocardiographic parameters, ability to achieve 7 metabolic equivalents and major adverse cardiovascular events**

| <b>Variable</b>                           | <b>Hazard ratio</b> | <b>95% CI</b> | <b>p-value</b> |
|-------------------------------------------|---------------------|---------------|----------------|
| <b>Age</b>                                | 0.99                | 0.97-1.01     | 0.447          |
| <b>Sex (female referent)</b>              | 0.64                | 0.36-1.13     | 0.126          |
| <b>Diabetes</b>                           | 1.75                | 1.08-2.84     | 0.023          |
| <b>Hypertension</b>                       | 1.50                | 0.53-4.21     | 0.444          |
| <b>Hyperlipidaemia</b>                    | 1.78                | 1.08-2.95     | 0.024          |
| <b>History of smoking</b>                 | 1.42                | 0.89-2.24     | 0.138          |
| <b>History of ischaemic heart disease</b> | 1.06                | 0.64-1.74     | 0.822          |
| <b>Previous kidney transplantation</b>    | 0.53                | 0.21-1.33     | 0.177          |
| <b>Body mass index</b>                    | 1.01                | 0.96-1.05     | 0.808          |
| <b>LV ejection fraction&lt;50%</b>        | 1.50                | 0.86-2.61     | 0.151          |
| <b>Abnormal stress echocardiogram</b>     | 0.97                | 0.55-1.71     | 0.903          |
| <b>Non-MI revascularization</b>           | 1.94                | 0.90-4.18     | 0.092          |
| <b>Achieved <math>\geq 7</math> METs</b>  | 0.55                | 0.32-0.95     | 0.033          |
| <b>Kidney transplant*</b>                 | 0.52                | 0.30-0.91     | 0.021          |

Hazard ratio for age was calculated per one year. Hazard ratio for body mass index was calculated per 1kg/m<sup>2</sup> increase.

\* Transplantation was treated as a time-dependent covariate

*CI – confidence interval, LV – left ventricle, METs – metabolic equivalents, MI – myocardial infarction*

**Table S6. Population characteristics comparing patients who achieved predicted metabolic equivalents who did and did not receive transplantation**

| <b>Demographics</b>                    | <b>Achieved Predicted METs and not transplanted (n=150)</b> | <b>Achieved Predicted METs and transplanted (n=279)</b> | <b>p-value</b> |
|----------------------------------------|-------------------------------------------------------------|---------------------------------------------------------|----------------|
| <b>Age (years)</b>                     | 53.7±11.8                                                   | 53.7±10.2                                               | 0.952          |
| <b>Male sex</b>                        | 85 (57%)                                                    | 170 (61%)                                               | 0.391          |
| <b>BMI (kg/m<sup>2</sup>)</b>          | 25.5±4.9                                                    | 25.7±4.4                                                | 0.716          |
| <b>Cardiovascular risk factors</b>     |                                                             |                                                         |                |
| <b>Diabetes</b>                        | 26 (17%)                                                    | 104 (37%)                                               | <0.001         |
| <b>Hypertension</b>                    | 127 (85%)                                                   | 250 (90%)                                               | 0.135          |
| <b>Hyperlipidemia</b>                  | 69 (46%)                                                    | 130 (47%)                                               | 0.906          |
| <b>History of smoking</b>              | 49 (32%)                                                    | 74 (27%)                                                | 0.180          |
| <b>History of IHD</b>                  | 26 (17%)                                                    | 63 (23%)                                                | 0.201          |
| <b>Previous kidney transplantation</b> | 23 (15%)                                                    | 32 (11%)                                                | 0.254          |
| <b>On renal replacement therapy</b>    |                                                             |                                                         |                |
| <b>Peritoneal Dialysis</b>             | 20 (13%)                                                    | 79 (28%)                                                | <0.001         |
| <b>Hemodialysis</b>                    | 49 (33%)                                                    | 143 (51%)                                               | <0.001         |
| <b>Cause of kidney disease</b>         |                                                             |                                                         |                |
| <b>Diabetes</b>                        | 23 (15%)                                                    | 58 (21%)                                                | 0.169          |
| <b>IgA nephropathy</b>                 | 35 (23%)                                                    | 46 (16%)                                                | 0.084          |
| <b>Reflux nephropathy</b>              | 15 (10%)                                                    | 26 (9%)                                                 | 0.819          |
| <b>Polycystic kidney disease</b>       | 19 (13%)                                                    | 38 (14%)                                                | 0.781          |
| <b>Glomerulonephritis</b>              | 40 (27%)                                                    | 73 (26%)                                                | 0.910          |

|                                                     |          |           |       |
|-----------------------------------------------------|----------|-----------|-------|
| <b>Renovascular</b>                                 | 9 (6%)   | 15 (5%)   | 0.789 |
| <b>Miscellaneous</b>                                | 9 (6%)   | 23 (8%)   | 0.267 |
| <b>Test during long interdialytic interval</b>      | 19 (46%) | 44 (37%)  | 0.290 |
| <b>Test performed on beta-blockers</b>              | 56 (37%) | 100 (36%) | 0.759 |
| <b>Baseline LVEF &lt;50%</b>                        | 17 (11%) | 27 (10%)  | 0.590 |
| <b>Abnormal Stress Echocardiogram</b>               | 18 (12%) | 24 (9%)   | 0.259 |
| <b>Non-diagnostic</b>                               | 2 (1%)   | 1 (0%)    | 0.387 |
| <b>Global failure in LV contractile reserve</b>     | 11 (7%)  | 8 (3%)    | 0.073 |
| <b>Inducible regional wall motion abnormalities</b> | 5 (3%)   | 15 (5%)   | 0.026 |
| <b>Underwent coronary angiography</b>               | 8 (5%)   | 8 (3%)    | 0.463 |
| <b>Non-MI revascularization</b>                     | 1 (1%)   | 5 (2%)    | 0.344 |

Values are mean  $\pm$  standard deviation or n (%).

*BMI – body mass index, IHD – ischaemic heart disease, LVEF – left ventricular ejection fraction, METs – metabolic equivalents, MI – myocardial infarction.*

**Table S7. Population characteristics comparing patients who achieved predicted metabolic equivalents who did not receive transplantation and patients who did not achieve predicted metabolic equivalents and received transplantation**

| <b>Demographics</b>                    | <b>Did Not Achieve Predicted METs and transplanted (n=246)</b> | <b>Achieved Predicted METs and not transplanted (n=150)</b> | <b>p-value</b> |
|----------------------------------------|----------------------------------------------------------------|-------------------------------------------------------------|----------------|
| <b>Age (years)</b>                     | 50.1±11.4                                                      | 53.7±11.8                                                   | 0.003          |
| <b>Male sex</b>                        | 182 (74%)                                                      | 85 (57%)                                                    | <0.001         |
| <b>BMI (kg/m<sup>2</sup>)</b>          | 28.5±5.2                                                       | 25.5±4.9                                                    | <0.001         |
| <b>Cardiovascular risk factors</b>     |                                                                |                                                             |                |
| <b>Diabetes</b>                        | 106 (43%)                                                      | 26 (17%)                                                    | <0.001         |
| <b>Hypertension</b>                    | 222 (90%)                                                      | 127 (85%)                                                   | 0.096          |
| <b>Hyperlipidemia</b>                  | 108 (44%)                                                      | 69 (46%)                                                    | 0.684          |
| <b>History of smoking</b>              | 81 (33%)                                                       | 49 (33%)                                                    | 0.957          |
| <b>History of IHD</b>                  | 50 (20%)                                                       | 26 (17%)                                                    | 0.463          |
| <b>Previous kidney transplantation</b> | 25 (10%)                                                       | 23 (15%)                                                    | 0.126          |
| <b>On renal replacement therapy</b>    |                                                                |                                                             |                |
| <b>Peritoneal Dialysis</b>             | 55 (22%)                                                       | 20 (13%)                                                    | 0.026          |
| <b>Hemodialysis</b>                    | 132 (54%)                                                      | 49 (33%)                                                    | <0.001         |
| <b>Cause of kidney disease</b>         |                                                                |                                                             |                |
| <b>Diabetes</b>                        | 72 (29%)                                                       | 23 (15%)                                                    | 0.002          |
| <b>IgA nephropathy</b>                 | 45 (18%)                                                       | 35 (23%)                                                    | 0.226          |
| <b>Reflux nephropathy</b>              | 20 (8%)                                                        | 15 (10%)                                                    | 0.525          |
| <b>Polycystic kidney disease</b>       | 32 (13%)                                                       | 19 (13%)                                                    | 0.922          |

|                                                     |           |          |       |
|-----------------------------------------------------|-----------|----------|-------|
| <b>Other</b>                                        | 30 (12%)  | 35 (23%) | 0.004 |
| <b>glomerulonephritis</b>                           |           |          |       |
| <b>Renovascular</b>                                 | 8 (3%)    | 9 (6%)   | 0.191 |
| <b>Vasculitides</b>                                 | 9 (4%)    | 5 (3%)   | 0.865 |
| <b>Miscellaneous</b>                                | 30 (12%)  | 9 (6%)   | 0.025 |
| <b>Test during long interdialytic interval</b>      | 34 (29%)  | 19 (46%) | 0.040 |
| <b>Test performed on beta-blockers</b>              | 109 (44%) | 56 (37%) | 0.172 |
| <b>Baseline LVEF &lt;50%</b>                        | 44 (18%)  | 17 (11%) | 0.080 |
| <b>Abnormal Stress Echocardiogram</b>               | 51 (21%)  | 18 (12%) | 0.026 |
| <b>Non-diagnostic</b>                               | 14 (6%)   | 2 (1%)   | 0.158 |
| <b>Global failure in LV contractile reserve</b>     | 15 (6%)   | 11 (7%)  | 0.017 |
| <b>Inducible regional wall motion abnormalities</b> | 22 (9%)   | 5 (3%)   | 0.251 |
| <b>Underwent coronary angiography</b>               | 21 (9%)   | 8 (5%)   | 0.809 |
| <b>Non-MI revascularization</b>                     | 12 (5%)   | 1 (1%)   | 0.023 |

Values are mean  $\pm$  standard deviation or n (%).

*BMI – body mass index, IHD – ischaemic heart disease, LVEF – left ventricular ejection fraction, METs – metabolic equivalents, MI – myocardial infarction.*

**Table S8. Population characteristics comparing patients who achieved <7 metabolic equivalents and received transplantation with patients who achieved ≥7 metabolic equivalents and did not receive transplantation**

| <b>Demographics</b>                   | <b>&lt;7 METs and<br/>transplanted<br/>(n=71)</b> | <b>≥7 METs and not<br/>transplanted<br/>(n=280)</b> | <b>p-value</b> |
|---------------------------------------|---------------------------------------------------|-----------------------------------------------------|----------------|
| <b>Age (years)</b>                    | 57.1±10.3                                         | 50.2±12.2                                           | <0.001         |
| <b>Male sex</b>                       | 43 (61%)                                          | 186 (66%)                                           | 0.354          |
| <b>BMI (kg/m<sup>2</sup>)</b>         | 28.4±4.4                                          | 26.7±5.2                                            | 0.013          |
| <b>Cardiovascular risk factors</b>    |                                                   |                                                     |                |
| <b>Diabetes</b>                       | 41 (58%)                                          | 86 (31%)                                            | <0.001         |
| <b>Hypertension</b>                   | 70 (99%)                                          | 241 (86%)                                           | 0.003          |
| <b>Hyperlipidaemia</b>                | 32 (45%)                                          | 138 (49%)                                           | 0.526          |
| <b>History of smoking</b>             | 24 (34%)                                          | 106 (38%)                                           | 0.527          |
| <b>History of IHD</b>                 | 19 (27%)                                          | 50 (18%)                                            | 0.092          |
| <b>Previous renal transplantation</b> | 7 (10%)                                           | 42 (15%)                                            | 0.264          |
| <b>On renal replacement therapy</b>   | 55 (77%)                                          | 150 (53%)                                           | <0.001         |
| <b>Peritoneal Dialysis</b>            | 21 (30%)                                          | 41 (15%)                                            | 0.003          |
| <b>Haemodialysis</b>                  | 34 (48%)                                          | 109 (39%)                                           | 0.170          |
| <b>Cause of kidney disease</b>        |                                                   |                                                     |                |
| <b>Diabetes</b>                       | 29 (41%)                                          | 72 (26%)                                            | 0.012          |
| <b>IgA nephropathy</b>                | 10 (14%)                                          | 51 (18%)                                            | 0.412          |
| <b>Reflux nephropathy</b>             | 6 (8%)                                            | 22 (8%)                                             | 0.869          |
| <b>Polycystic kidney disease</b>      | 5 (7%)                                            | 30 (11%)                                            | 0.356          |

|                                                     |          |          |        |
|-----------------------------------------------------|----------|----------|--------|
| <b>Glomerulonephritis</b>                           | 11 (15%) | 62 (22%) | 0.218  |
| <b>Renovascular</b>                                 | 4 (6%)   | 19 (7%)  | 0.726  |
| <b>Miscellaneous</b>                                | 6 (8%)   | 24 (9%)  | 0.948  |
| <b>Test during long interdialytic interval</b>      | 7 (25%)  | 44 (46%) | 0.044  |
| <b>Baseline LVEF &lt;50%</b>                        | 15 (21%) | 41 (15%) | 0.183  |
| <b>Abnormal Stress Echocardiogram</b>               | 23 (32%) | 37 (13%) | <0.001 |
| <b>Non-diagnostic</b>                               | 10 (14%) | 4 (1%)   | 0.004  |
| <b>Global failure in LV contractile reserve</b>     | 3 (4%)   | 20 (7%)  | 0.001  |
| <b>Inducible regional wall motion abnormalities</b> | 10 (14%) | 13 (5%)  | 0.518  |
| <b>Underwent coronary angiography</b>               | 11 (15%) | 15 (5%)  | 0.580  |
| <b>Non-MI revascularization</b>                     | 5 (7%)   | 6 (2%)   | 0.034  |

Values are mean  $\pm$  standard deviation or n (%).

*BMI* – body mass index, *IHD* – ischaemic heart disease, *LV* – left ventricular, *LVEF* – left ventricular ejection fraction. *METs* – metabolic equivalents, *MI* – myocardial infarction



**Figure S1.** Relationship between relative hazard of MACE with METs

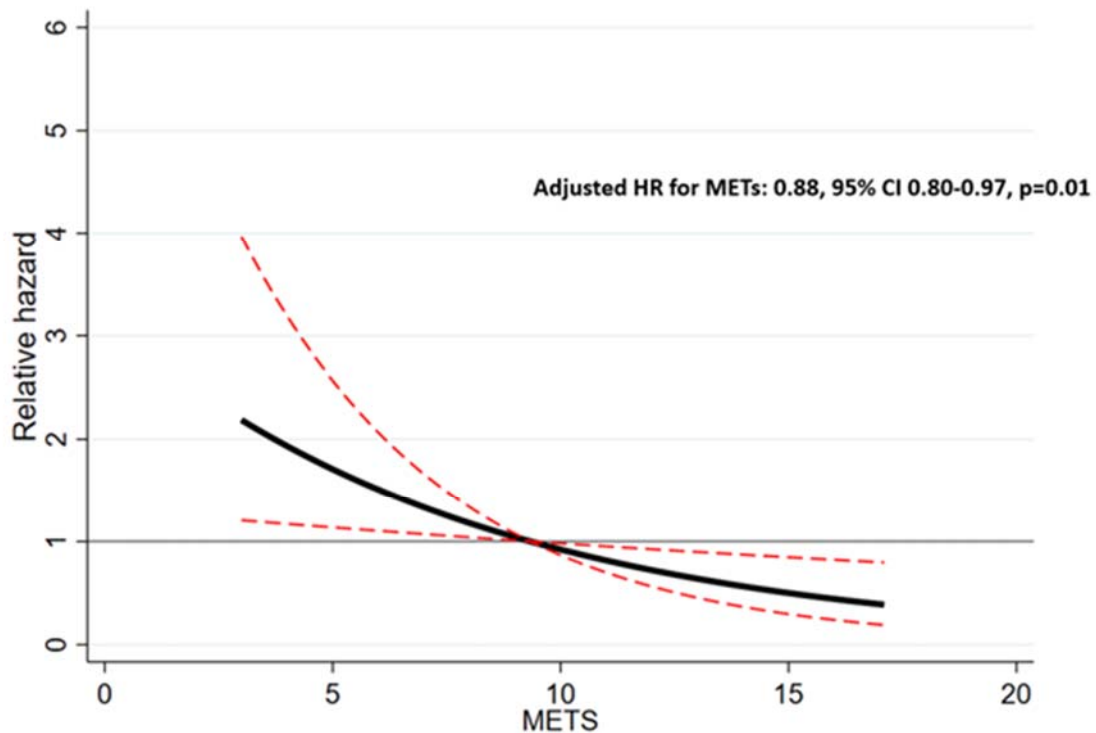

Graph demonstrates relative hazard of MACE with associated 95% CI for METs fitted from multivariable modelling at 7 years, using age, sex, diabetes, hypertension, hyperlipidemia, history of smoking, history of ischaemic heart disease, previous kidney transplantation, body mass index, baseline left ventricular dysfunction, abnormal exercise stress echocardiography result, non-myocardial infarction revascularization prior to transplantation, ability to achieve predicted METs, and transplantation (treated as time-dependent covariable). Results demonstrate a reduction of 12% in hazard for each increasing unit of METs ( $p=0.01$ ).

*CI – confidence interval, HR – Hazard ratio, MACE – Major adverse cardiovascular events, METs – metabolic equivalents*

**Figure S2.** Cumulative MACE free proportion stratified by MET groups

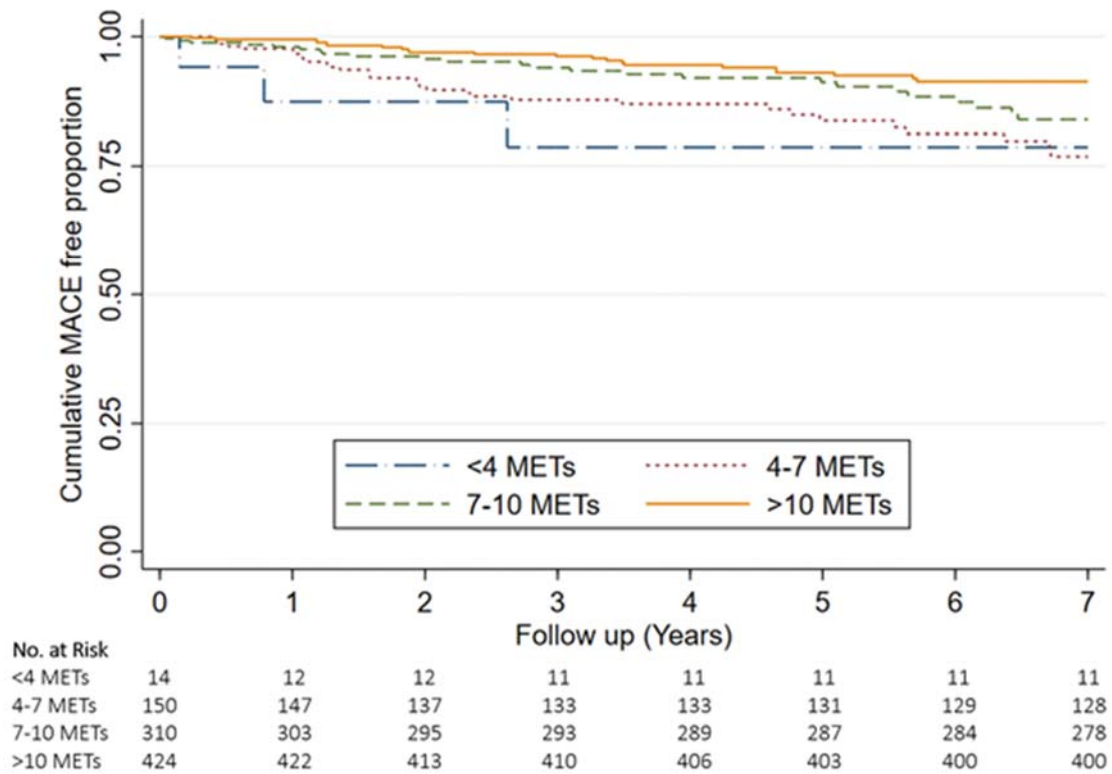

With increasing categories of METs, patients have an improved freedom from MACE ( $p < 0.001$ ).

*MACE – Major adverse cardiovascular events, METs – metabolic equivalents*
